# Supplementary material
Source: Springer Nature journal article supplement (https://www.springermedizin.de/resource/supplementary/12916_2013_945_MOESM4_ESM.pdf/9598888)

## Pooled studies

**ESRS**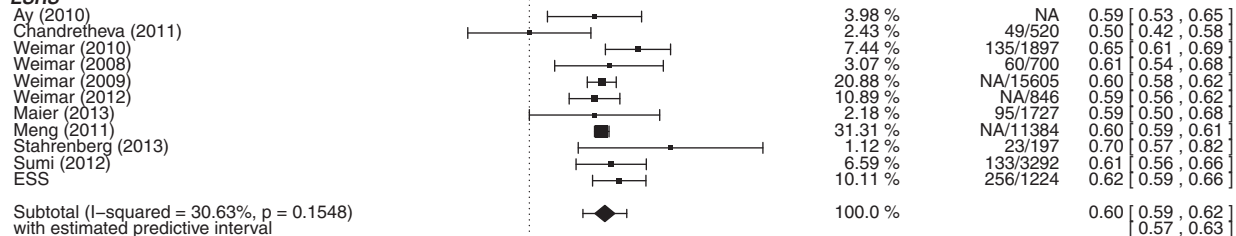**SPI-II**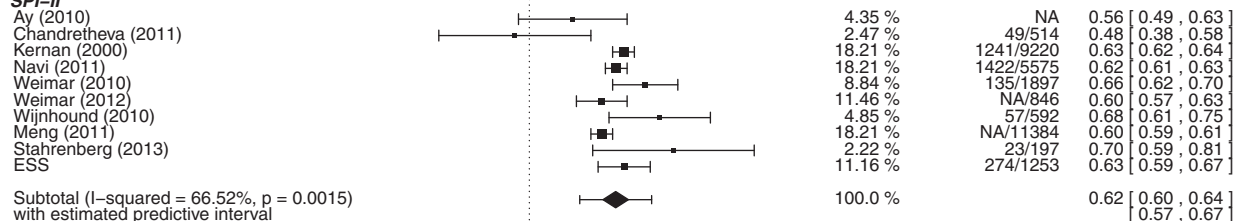

## Single studies

**ABCD2**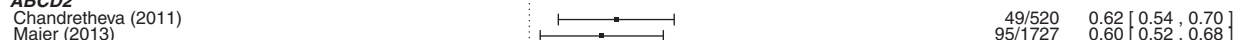**RRE-90 (Model A)**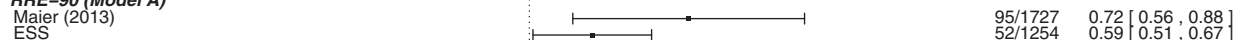**RRE-90 (Model B)**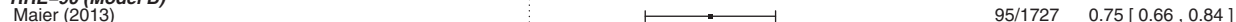**LiLAC**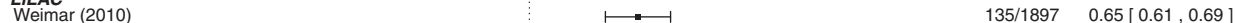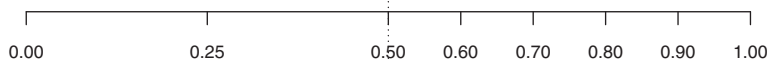

Supplement: MOESM4 [file 9598888]
